# Supplementary material for: A conserved clade of ER-membrane tethered SBP/SPL transcription factors regulate cell death mediated by ER stress in plants
Source: Research Square preprint supplement (doi:10.21203/rs.3.rs-7794624/v1), 2025-10-09
Supplement: Supplementary file 1 [file 774f3f50018359289ca2a3cb.docx]

**Supplementary Material**


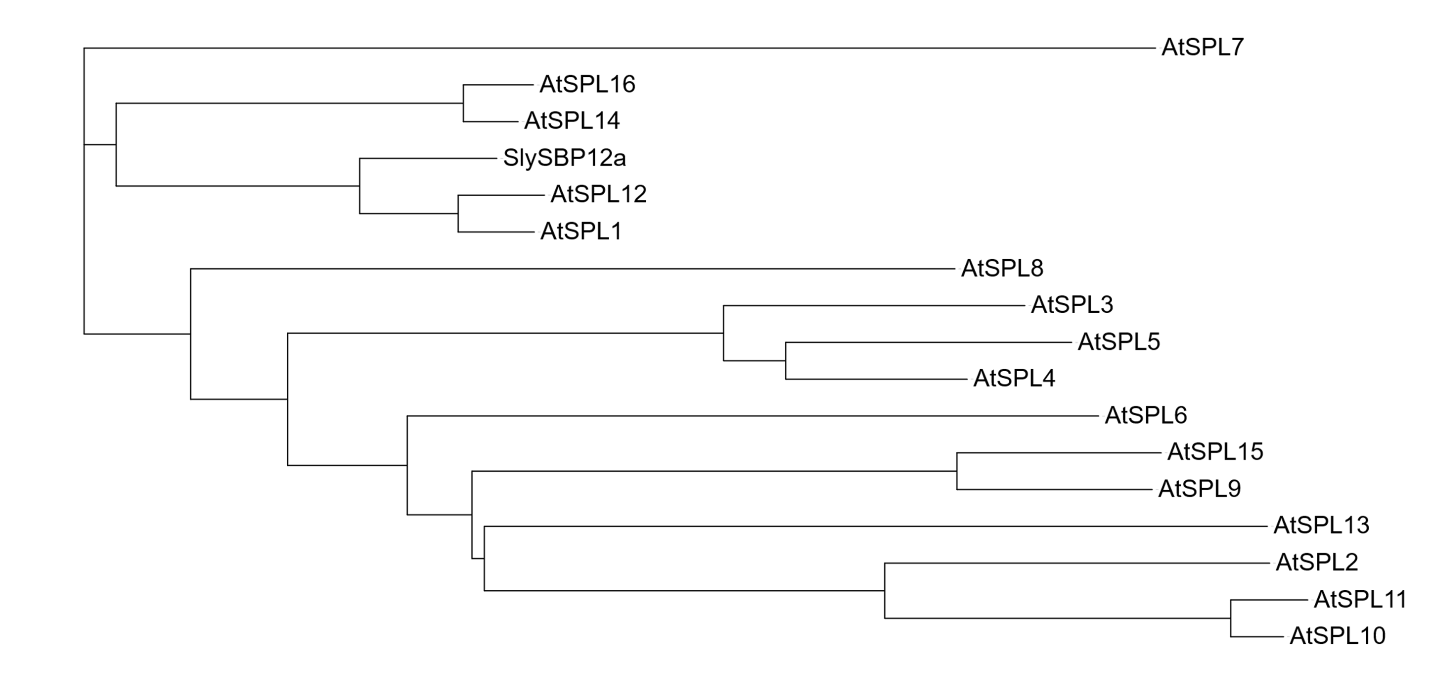


**Supplementary Fig. S1: SlySBP12a homology to AtSPL family**

Phylogenetic tree showing relationship between SlySBP12a and *Arabidopsis thaliana* SPL family protein. Tree generated by IQTREE2 and visualized with interactive Tree of Life. Sequences retrieved from Plant Transcription Factor Database.


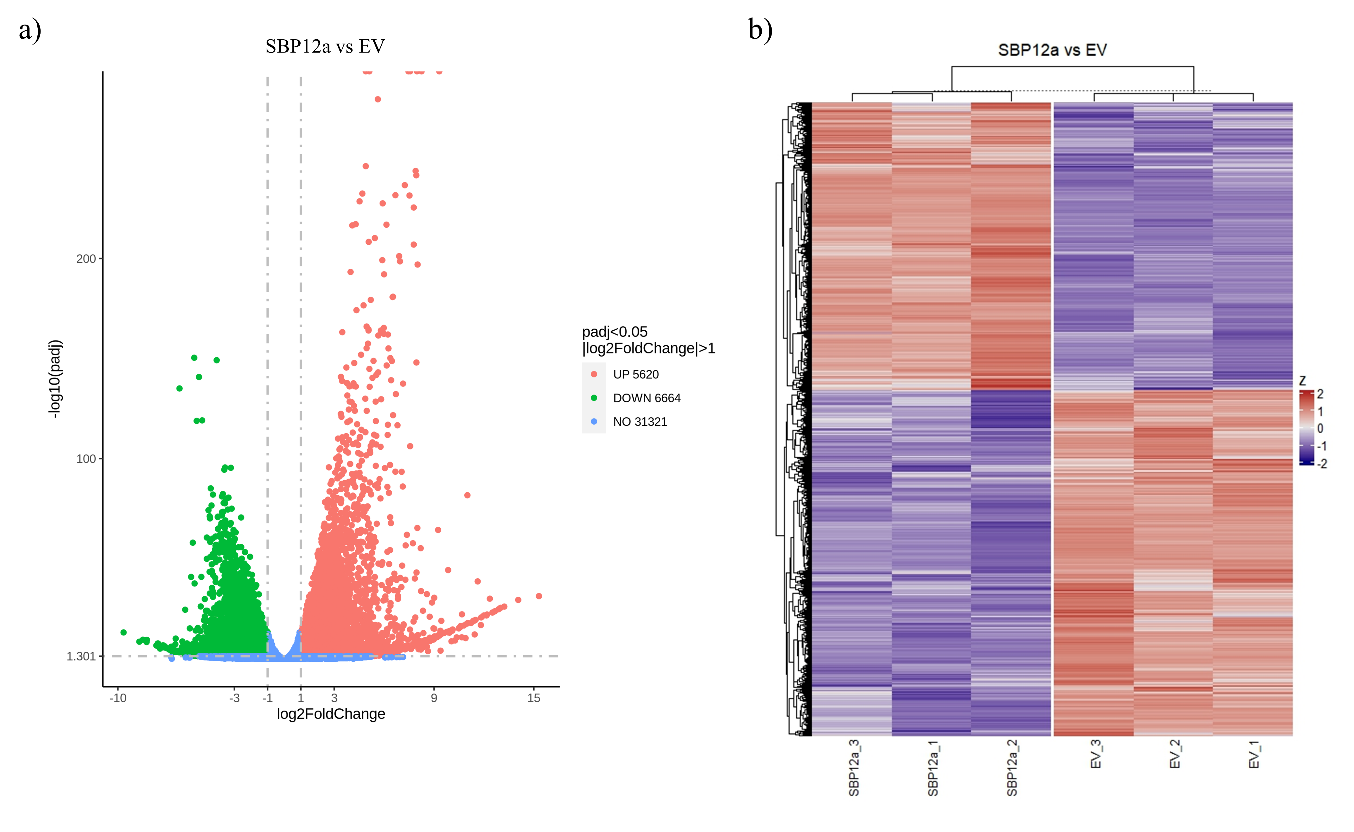


**Supplementary Fig S2: RNA sequencing of SlySBP12a(ΔTMD) overexpression in N. benthamiana** (a) Volcano plot showing differentially expressed genes (DEGs) in the comparison of SBP12a to the EV control. The x-axis displays log₂ fold change (SBP12a/EV) and the y-axis shows −log₁₀ adjusted P value. Genes passing the significance thresholds (FDR < 0.05 and |log₂FC| ≥ 1) are colored red for up-regulated and blue for down-regulated; non-significant genes are shown in gray. Vertical dashed lines denote the log₂FC cutoff and the horizontal dashed line marks the FDR threshold. (b) Summary heat map showing differentially expressed genes (DEGs) in the comparison of SBP12a to the EV control. Columns are biological replicates grouped by treatment; rows are DEGs passing FDR < 0.05 and |log₂FC| ≥ 1. Values are variance-stabilized expression scaled as row-wise Z-scores. Red indicates higher expression and blue indicates lower expression relative to each gene’s mean; dendrograms show hierarchical clustering.


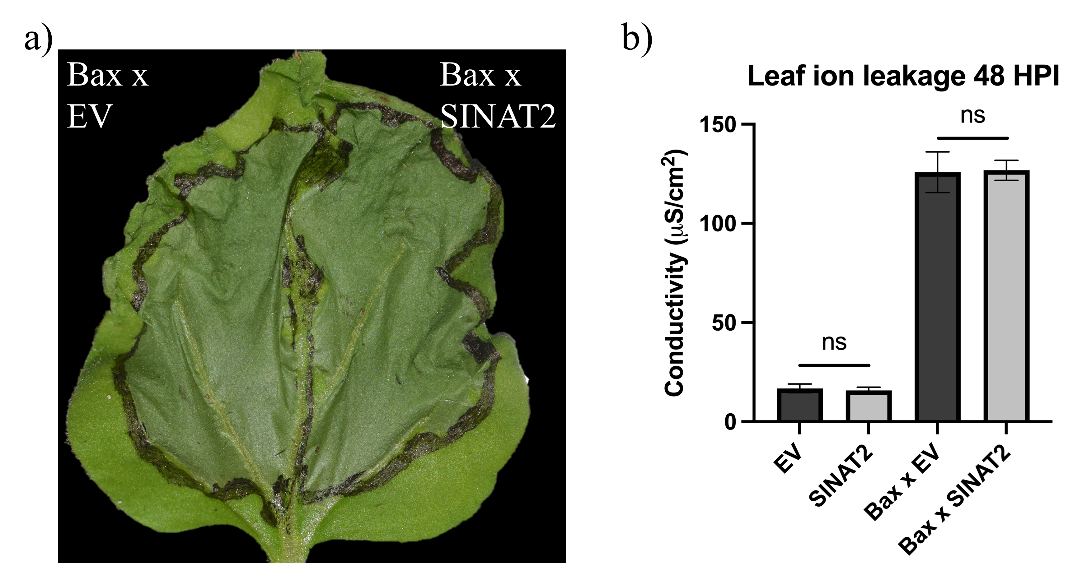


**Supplementary Fig. S3: SINAT2 does not inhibit cell death induced by Bax** (a) *Nicotiana benthamiana* leaves infiltrated with *Agrobacterium tumefaciens*. The left half of each leaf was co-infiltrated with the cell death inducing protein Bax and empty vector at a 1:1 ratio while the right half was transformed with Bax and SINAT2 at a 1:1 ratio. Images were taken 3 days post‐transformation. (b) Electrolyte leakage assay used to quantify cell death. Data is presented as mean ± SEM (n=6).


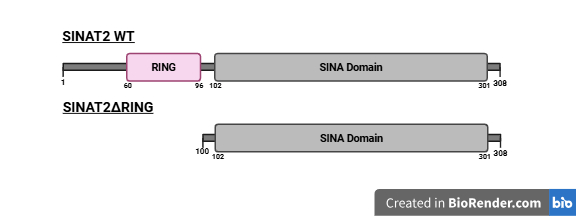


**Supplementary Fig. S4: SINAT2ΔRING truncation design** Domain structure of wildtype SINAT2 and truncated SINAT2ΔRING. Sequences retrieved from Uniprot and domains predicted with SMART.

**
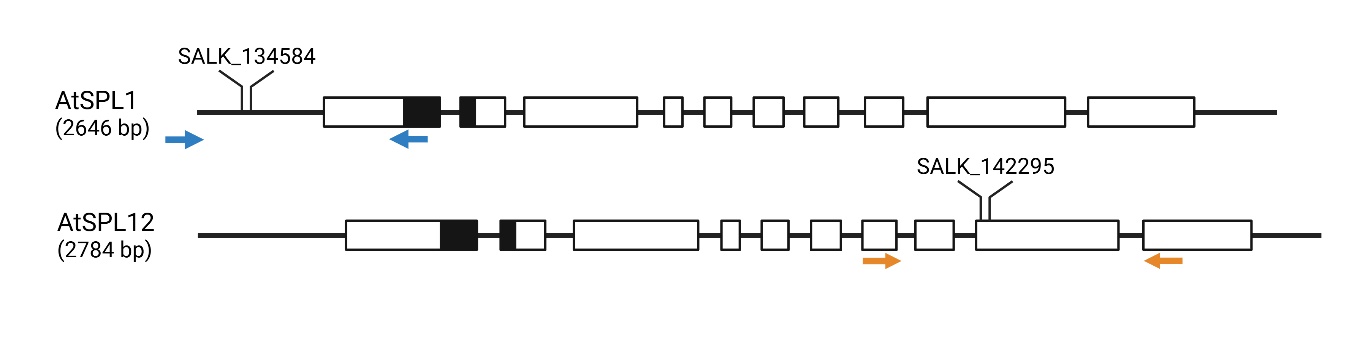
**

**Supplementary Fig. S5: Schematic of *Arabidopsis thaliana* SPL1 (AT2G47070) and SPL12 (AT3G60030) mutants** Diagram of AtSPL1 and AtSPL12 genomic structure, with exons shown as white boxes and introns/UTRs shown as a line. The sequence for the SBP box domain is shown as black filled in box on the exons. Inserts depict the T-DNA insertions in the mutant strains *atspl1* (SALK_134584) and *atspl12* (SALK_142295), and colored arrows show the locations of genotyping primers used to screen the mutants.

**Supplementary Table S1**

| **Target Gene** | **Primer Sequence** | **Purpose** |
| --- | --- | --- |
| AtSPL1 | fwd: 5'-ATGGAAGCTAGAATTGATGAAGG-3' rev: 5'-TCAGCTTGTTCCATAGTCCAATAAC-3' | Overexpression in *N. benthamiana*, Co-IP, subcellular localization |
| AtSPL1  (ΔTMD) | fwd: AtSPL1 fwd primer rev: 5'-TCATGTGATCTCCAAGG-3' | Overexpression in *N. benthamiana*, Co-IP, subcellular localization |
| AtSPL12 | fwd: 5'-ATGGAAGCTAGAATTGAAGGTG-3' rev: 5'-CTAGCTTGTTCCATACTCAAG -3' | Overexpression in *N. benthamiana*, Co-IP, subcellular localization |
| AtSPL12  (ΔTMD) | fwd: AtSPL12 fwd primer rev: 5'-TCATGTTATCTCCAAGCTTG-3' | Overexpression in *N. benthamiana*, Co-IP, subcellular localization |
| SINAT2 | fwd: 5'-ATGGCTCCTGGAGGCAGTGCTTTG-3' rev: 5'-TTACTCCTCTTTCCAGATTCG-3' | Overexpression in *N. benthamiana*, Co-IP |
| SINAT2  (ΔRING) | fwd: 5'-ATAAGATGCTTAGCTCTTG-3' rev: 5'-SINAT2 rev primer-3' | Overexpression in *N. benthamiana* |
| Ser2 | fwd: 5'-ATGTGTTGTTTTCGCCTGCC-3' rev: 5'-TCACAAAGGTTGATGAGC-3' | Overexpression in *N. benthamiana* |
| Ser3 | fwd: 5'-ATGAAATTGATCAATCAAACTG-3' rev: 5'-TTAGGATAATTTGCCTTGAG-3' | Overexpression in *N. benthamiana* |
| Ser31 | fwd: 5'-ATGGATATCGTATCAAGGATTATG-3' rev: 5'-TTAGTTTCGGTGGAAAGGAAG-3' | Overexpression in *N. benthamiana* |
| MMP1 | fwd: 5'-ATGCCTTTGACATTCAATTGG-3' rev: 5'-TCATAAACATAAGGAAAAGATCAAAG-3' | Overexpression in *N. benthamiana* |
| MMP2 | fwd: 5'-ATGTCTACGTTTCCAAGTT-3' rev: 5'-TCATAAACATAAAGAAAAGATC-3' | Overexpression in *N. benthamiana* |
| Subt | fwd: 5'-ATGAAGAATCGTAACTTTGTAG-3' rev: 5'-TTATGCGGAAGCTGCTGC-3' | Overexpression in *N. benthamiana* |
| CathB | fwd: 5'-ATGGCCTTGACCCTGAAG-3' rev: 5'-TCAAAAATAGGCAAATCTTGCG-3' | Overexpression in *N. benthamiana* |
| atspl1 LB | 5'-AAAGCCCAGACCATAATGACC-3' | *Arabidopsis* mutant genotyping PCR |
| atspl1 RB | 5'-GGAAAAACTGACGTCCCCTAG-3' | *Arabidopsis* mutant genotyping PCR |
| atspl12 LB | 5'-CGAGAAGTGACCTCGTAAACG-3' | *Arabidopsis* mutant genotyping PCR |
| atspl12 RB | 5'-AAAGCCCAGACCATAATGACC-3' | *Arabidopsis* mutant genotyping PCR |
| LBb1.3 | 5'-ATTTTGCCGATTTCGGAAC-3' | *Arabidopsis* mutant genotyping PCR |
| attB1 adapter | 5’-GGGGACAAGTTTGTACAAAAAAGCAGGCTGG-3’ | Gateway Cloning |
| attB2 adapter | 5’-GGGGACCACTTTGTACAAGAAAGCTGGGTG-3’ | Gateway Cloning |
| NbCathB | fwd: 5'-CCACCCCAAAGTGTCAGAGG-3' rev: 5'-GGAGACCTCGACTGGTCCAT-3' | RT-qPCR probes |
| NbEF1α | fwd: 5'-AGCTTTACCTCCCAAGTCATC-3' rev: 5'-AGAACGCCTGTCAATCTTGG-3' | RT-qPCR probes |

**Supplementary Table 2** – Protease list with gene ID and fold change

| **Gene ID** | **Log2FC vs EV** | **Gene Description** | **Gene Code** |
| --- | --- | --- | --- |
| Niben101Scf00180g07005 | 7.26 | Serine carboxypeptidase-like 31 | ser31 |
| Niben101Scf06662g02015 | 6.80 | matrix metalloproteinase | mmp1 |
| Niben101Scf00317g04009 | 6.46 | matrix metalloproteinase | mmp2 |
| Niben101Scf02976g00006 | 4.35 | Cathepsin B | cathbA |
| Niben101Scf07497g01009 | 3.41 | Serine carboxypeptidase-like 2 | ser2 |
| Niben101Scf04560g03001 | 2.63 | Serine carboxypeptidase 3 | ser3 |
| Niben101Scf12205g02009 | 2.11 | subtilisin-like serine protease 2 | subt2 |
