# Supplementary material for: A conserved clade of ER-membrane tethered SBP/SPL transcription factors regulate cell death mediated by ER stress in plants
Source: Research Square preprint supplement (doi:10.21203/rs.3.rs-7794624/v1), 2025-10-09

**Supplementary Figure S6:** **Uncropped Western Blots**

**Accompanies Figure 5**

**
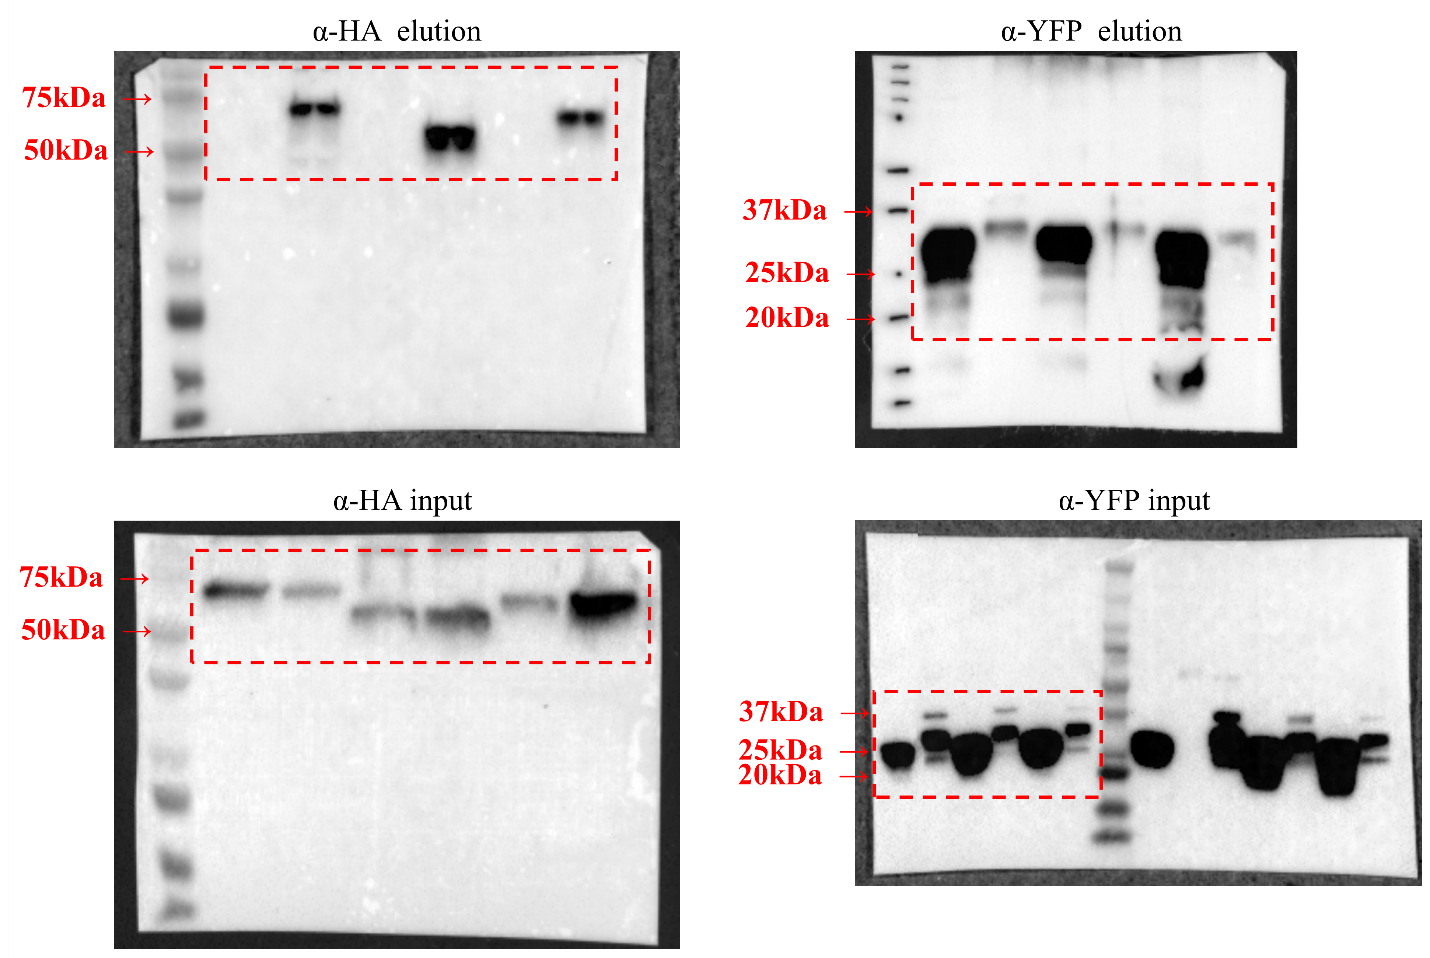
**

**Accompanies Figure 6c**


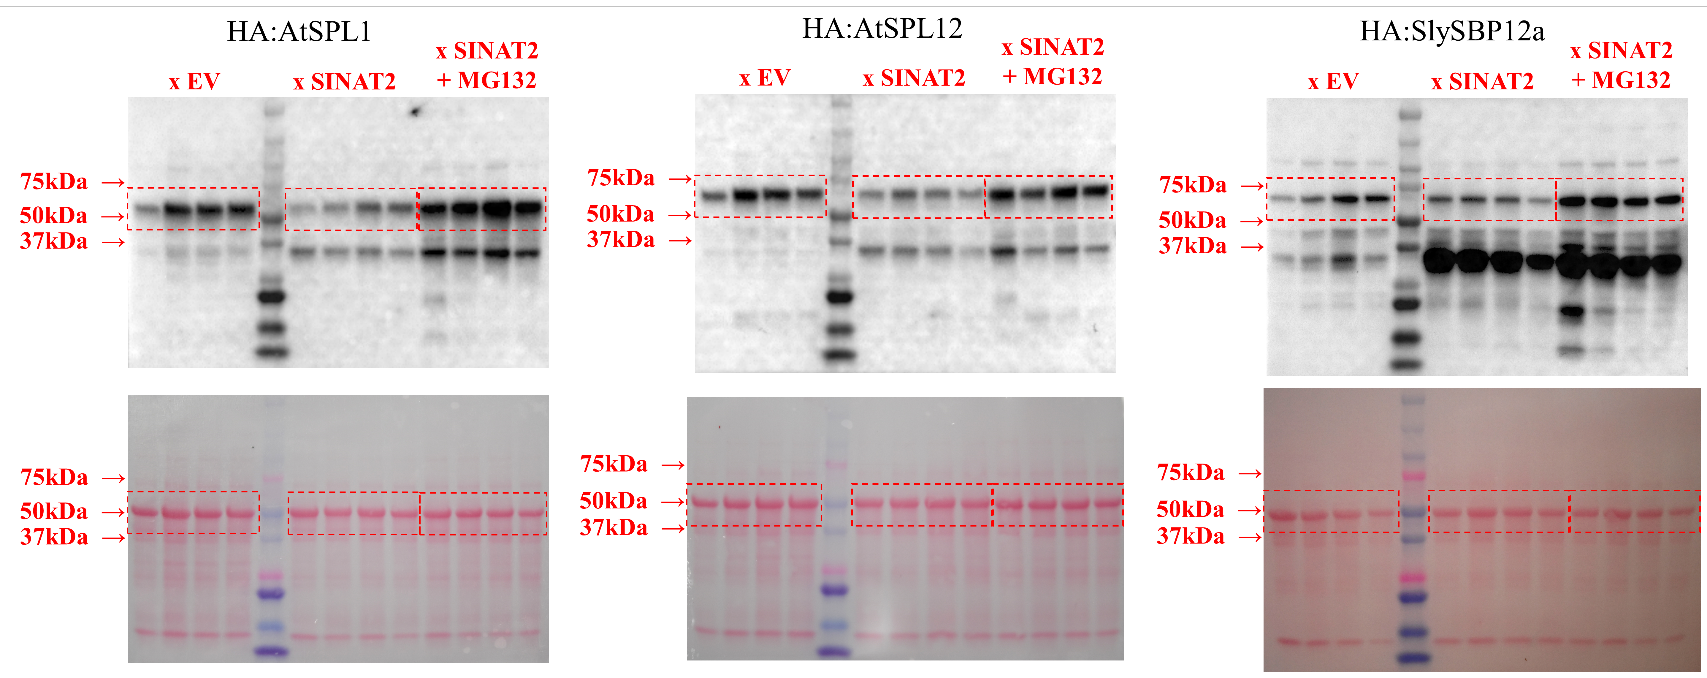


**Accompanies Figure 7c**


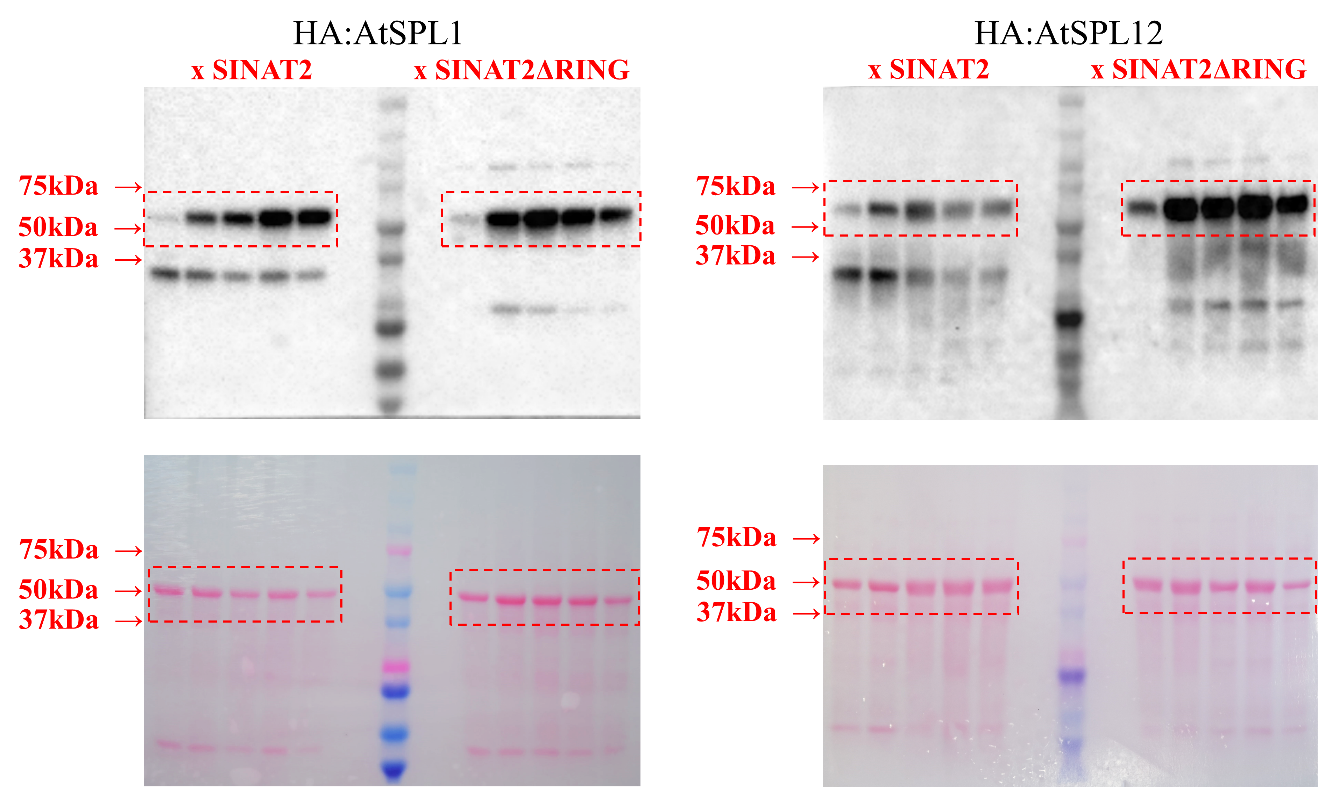

Supplement: Supplementary file 2 [file 796104a9c5248225ceb28833.docx]
